# Supplementary material for: Age-related islet inflammation marks the proliferative decline of pancreatic beta-cells in zebrafish
Source: eLife. 2018 Apr 6;7:e32965. doi: 10.7554/eLife.32965 (PMC5943033; doi:10.7554/eLife.32965)
Supplement: Figure 6—source data 1. [file elife-32965-fig6-data1.xlsx]

## Sheet: Figure 6 source data
	Janjuha et. al.
	Age-related Islet Inflammation Marks the Proliferative Decline of Pancreatic Beta-cells in Zebrafish
	Figure 6 - source data
	Figure 6b
	Relative Fold Change between NF-kB:GFPhigh and NF-kB:GFPlow beta-cells
	socs2	cish	rapgef4	spry4
	2.75108	0.742262	0.835088	0.726986
	3.89062	0.655197	1.34723	1.52626
	1.77769	0.823591	1.40444	1.3566
	2.75108		1.38191
