# Supplementary material for: Age-related islet inflammation marks the proliferative decline of pancreatic beta-cells in zebrafish
Source: eLife journal article supplement (doi:10.7554/elife.32965), 2018-04-06
Supplement: supp [file elife_poa_e32965_Supplementary_File_2.docx]

**Supplementary File 2.**

**List of primer sequences of genes validated using single-cell RT-qPCR and bulk RT-qPCR.**

| **Genes** | **Forward primer** | **Reverse primer** |
| --- | --- | --- |
| insa | TTTAAATGCAAAGTCAGCCACCTCAG | GGCTTCTTCTACAACCCCAAGAGAGA |
| isl1 | AGCAGCAGCAACCCAACGACAA | TGCACCTCCACTTGGTTTGCCT |
| neurod1 | ACGCAGCGCTGTGATATACCGA | TCGCGTTCAACTGGGCGTTCAT |
| tnfa | GCGCTTTTCTGAATCCTACG | TGCCCAGTCTGTCTCCTTCT |
| tnfrsf1b | TCCCATCACAGATGTCAACAC | CTGCTGCTGTGGCTCTGAC |
| ikbaa | CCTGCGTTCCATTCTCACCT | GGCCACTACACTGCTCCTTT |
| ef1a | TCTCTCAATCTTGAAACTTATCAATCA | AACACCCAGGCGTACTTGAA |
| bact2(bact1) | CGAGCAGGAGATGGGAACC | CAACGGAAACGCTCATTGC |
| Rpl13α | TCTGGAGGACTGTAAGAGGTATGC | AGACGCACAATCTTGAGAGCAG |
| socs2 | GCAATCCGAAACCCAAGTC | GCGGAGATGGTGAAGAGGTA |
| insa | TTTAAATGCAAAGTCAGCCACCTCAG | GGCTTCTTCTACAACCCCAAGAGAGA |
| gfp | CCTGAAGTTCATCTGCACCA | GGTCTTGTAGTTGCCGTCGT |
