# Supplementary material for: Age-related islet inflammation marks the proliferative decline of pancreatic beta-cells in zebrafish
Source: eLife. 2018 Apr 6;7:e32965. doi: 10.7554/eLife.32965 (PMC5943033; doi:10.7554/eLife.32965)
Supplement: Supplementary file 1. [file elife-32965-supp1.xlsx]

## Sheet: Sheet1
List of genes differentially expressed from the RNA-Seq of beta-cells at 3 mpf and 1 ypf (log2FC ±1.5).
Ensembl_id	gene_symbol	Description	logFC_Oldvsyoung	PValue
ENSDARG00000052118	CR382298.3	Uncharacterized protein	11.61	2.1e-35
ENSDARG00000069093	col2a1a	collagen type II, alpha-1a	9.04	1.87e-57
ENSDARG00000045835	si:dkey-14d8.6	si:dkey-14d8.6	8.61	6.22e-10
ENSDARG00000068621	si:ch211-181d7.3	si:ch211-181d7.3	7.83	3.79e-32
ENSDARG00000053502	cryaa	crystallin, alpha A	6.32	7.7e-40
ENSDARG00000018146	gpx1a	glutathione peroxidase 1a	5.8	5.78e-26
ENSDARG00000023578	lpp	LIM domain containing preferred translocation partner in lipoma	5.55	3.39e-34
ENSDARG00000076411	ptrfa	polymerase I and transcript release factor a	4.87	4.04e-22
ENSDARG00000069095	gls2	glutaminase 2 (liver, mitochondrial)	4.14	9.58e-23
ENSDARG00000094719	si:dkeyp-1h4.9	si:dkeyp-1h4.9	3.84	0.00306
ENSDARG00000045557	socs2	suppressor of cytokine signaling 2	3.62	1.81e-09
ENSDARG00000045064	ablim1b	actin binding LIM protein 1b	3.61	1.21e-15
ENSDARG00000041623	mt2	metallothionein 2	3.52	8.56e-19
ENSDARG00000009087	cd74a	CD74 molecule, major histocompatibility complex, class II invariant chain a	3.41	0.00043
ENSDARG00000016319	c9	complement component 9	3.35	2.03e-20
ENSDARG00000059054	pdk2	pyruvate dehydrogenase kinase, isoenzyme 2	3.3	1.3e-14
ENSDARG00000006065	znf385b	zinc finger protein 385B	3.3	2.63e-12
ENSDARG00000095767	dio3b	deiodinase, iodothyronine type IIIb	3.12	1.72e-10
ENSDARG00000090814	si:dkey-18a10.3	si:dkey-18a10.3	3.07	7.63e-13
ENSDARG00000060927	si:ch211-136a13.1	si:ch211-136a13.1	2.85	2.83e-12
ENSDARG00000036628	cd74b	CD74 molecule, major histocompatibility complex, class II invariant chain b	2.72	0.000109
ENSDARG00000042840	eml1	echinoderm microtubule associated protein like 1	2.71	1.38e-08
ENSDARG00000087303	cebpd	CCAAT/enhancer binding protein (C/EBP), delta	2.69	3.32e-12
ENSDARG00000090889	BX005069.4	Uncharacterized protein	2.66	9.13e-07
ENSDARG00000095298	ftr73	finTRIM family, member 73	2.59	3.22e-12
ENSDARG00000078828	npb	neuropeptide B	2.58	4.12e-13
ENSDARG00000052242	aff2	AF4/FMR2 family, member 2	2.53	6.94e-05
ENSDARG00000076564	hspg2	heparan sulfate proteoglycan 2	2.51	1.37e-10
ENSDARG00000093193	chia.6	chitinase, acidic.6	2.49	1.57e-12
ENSDARG00000086579	APLF	aprataxin and PNKP like factor	2.28	1.05e-09
ENSDARG00000042725	cebpb	CCAAT/enhancer binding protein (C/EBP), beta	2.26	2.32e-10
ENSDARG00000055278	cfb	complement factor B	2.15	1.13e-08
ENSDARG00000056762	zgc:172079	zgc:172079	2.14	2.29e-08
ENSDARG00000007682	ppdpfa	pancreatic progenitor cell differentiation and proliferation factor a	2.11	4.1e-05
ENSDARG00000075597	flrt1b	fibronectin leucine rich transmembrane 1b	2.1	9.11e-07
ENSDARG00000086374	isg15	ISG15 ubiquitin-like modifier	2	0.000207
ENSDARG00000027609	HPN (1 of 2)	hepsin	1.96	5.83e-09
ENSDARG00000060316	cish	cytokine inducible SH2-containing protein	1.96	1.98e-07
ENSDARG00000013076	bmi1b	B lymphoma Mo-MLV insertion region 1b	1.94	2.44e-07
ENSDARG00000075924	RAPGEF4 (1 of 2)	Rap guanine nucleotide exchange factor (GEF) 4	1.9	1.4e-08
ENSDARG00000037873	cyp3c1l2	cytochrome P450, family 3, subfamily c, polypeptide 1 like, 2	1.87	2.43e-07
ENSDARG00000053279	apln	apelin	1.83	2.81e-06
ENSDARG00000016200	trib3	tribbles homolog 3 (Drosophila)	1.77	4.03e-07
ENSDARG00000075282	irs2	insulin receptor substrate 2	1.77	1.11e-06
ENSDARG00000040944	ntd5	ntl-dependent gene 5	1.74	0.000649
ENSDARG00000068732	spry4	sprouty (Drosophila) homolog 4	1.73	3.49e-06
ENSDARG00000002991	cep135	centrosomal protein 135	1.72	5.27e-07
ENSDARG00000078389	si:dkey-188i13.7	si:dkey-188i13.7	1.71	0.012249
ENSDARG00000002576	cabp5a	calcium binding protein 5a	1.7	1.38e-06
ENSDARG00000070165	tnfrsf1b	tumor necrosis factor receptor superfamily, member 1B	1.69	7.94e-07
ENSDARG00000005716	olfml2ba	olfactomedin-like 2Ba	1.68	2.33e-06
ENSDARG00000035652	sat1a.1	spermidine/spermine N1- acetyltransferase 1a, duplicate 1	1.63	1.43e-06
ENSDARG00000036102	ctdsp2	CTD (carboxy-terminal domain, RNA polymerase II, polypeptide A) small hosphatase 2	1.63	2.24e-06
ENSDARG00000033567	fkbp1ab	FK506 binding protein 1Ab	1.62	5.97e-06
ENSDARG00000015856	slc25a40	solute carrier family 25, member 40	1.6	3.56e-06
ENSDARG00000056228	pld1a	phospholipase D1a	1.59	1.27e-06
ENSDARG00000010385	sept4a	septin 4a	1.56	8.72e-06
ENSDARG00000074335	boc	brother of CDO	1.56	0.001083
ENSDARG00000037403	HSPA8 (1 of 2)	heat shock 70kDa protein 8	1.55	1.46e-06
ENSDARG00000093549	sepp1a	selenoprotein P, plasma, 1a	1.54	3.82e-05
ENSDARG00000016188	SBNO2 (2 of 2)	strawberry notch homolog 2 (Drosophila)	1.52	5.09e-05
ENSDARG00000087732	Metazoa_SRP	Metazoan signal recognition particle RNA	-1.53	1.04e-05
ENSDARG00000095170	lrrfip1b	leucine rich repeat (in FLII) interacting protein 1b	-1.55	1.21e-08
ENSDARG00000053708	si:dkey-46i24.3	si:dkey-46i24.3	-1.55	7.19e-07
ENSDARG00000070222	fam43b	family with sequence similarity 43, member B	-1.59	1.71e-07
ENSDARG00000003281	pik3ip1	phosphoinositide-3-kinase interacting protein 1	-1.59	2.38e-07
ENSDARG00000052873	si:dkey-217f16.3	si:dkey-217f16.3	-1.75	9.56e-10
ENSDARG00000076870	piezo1	piezo-type mechanosensitive ion channel component 1	-1.75	2.36e-08
ENSDARG00000033280	TPO	thyroid peroxidase	-1.77	6.28e-07
ENSDARG00000005823	slc39a10	solute carrier family 39 (zinc transporter), member 10	-1.79	1.34e-10
ENSDARG00000006747	tmem178b	transmembrane protein 178B	-1.98	7.19e-11
ENSDARG00000036179	myo1ea	myosin IE, a	-2.39	2.8e-17
ENSDARG00000003449	pde10a	phosphodiesterase 10A	-2.56	1.88e-17
ENSDARG00000039576	fstl1b	follistatin-like 1b	-2.61	1.98e-21
