# Supplementary figures and images for: Age-related islet inflammation marks the proliferative decline of pancreatic beta-cells in zebrafish
Source: eLife journal article supplement (doi:10.7554/elife.32965), 2018-04-06

Figure 3 – figure supplement 3

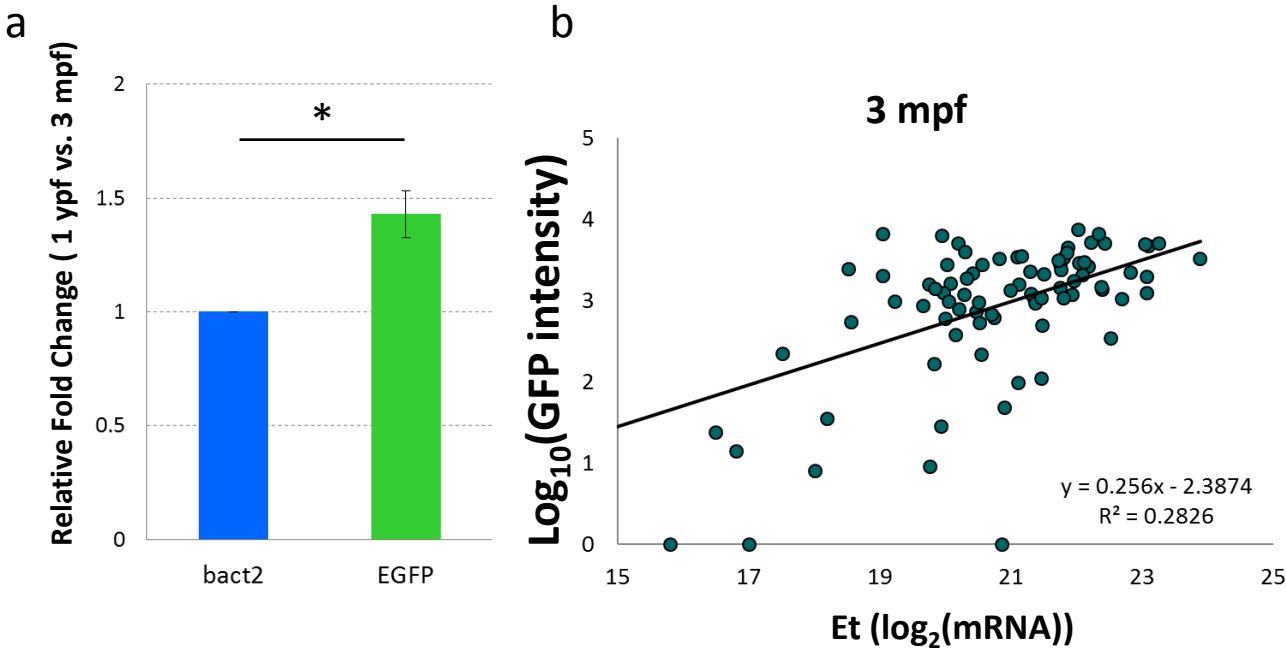

Supplement: supp [file elife-32965-supp-v1.zip]

**Figure 6 – figure supplement 2**

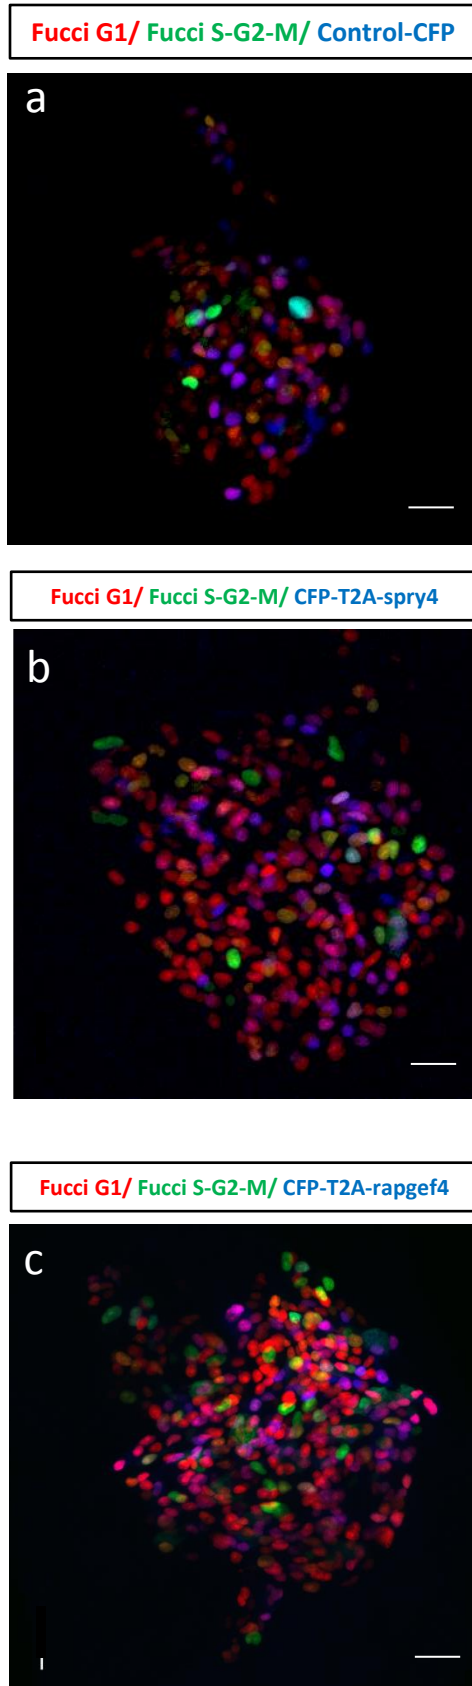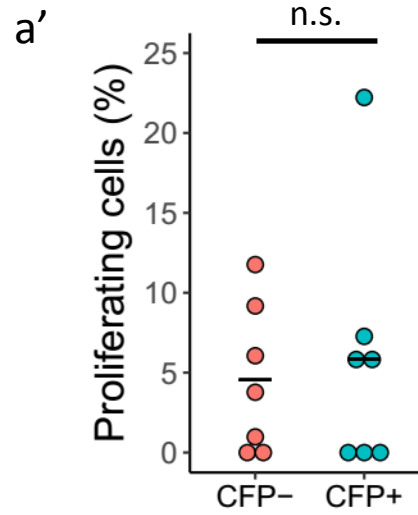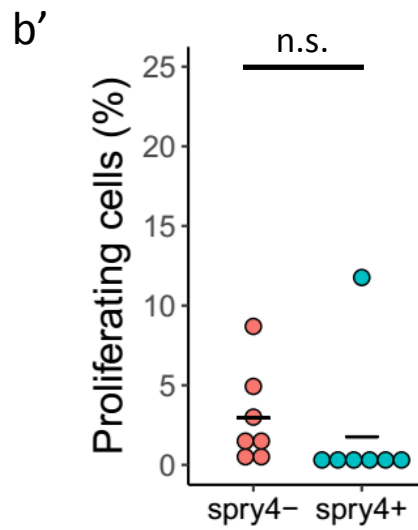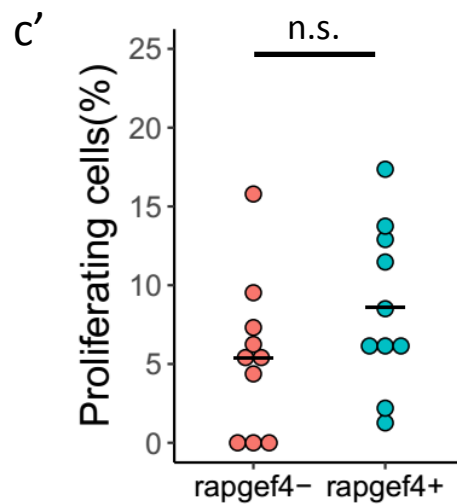

Supplement: supp [file elife-32965-supp-v1.zip]

Figure 4 – figure supplement 1

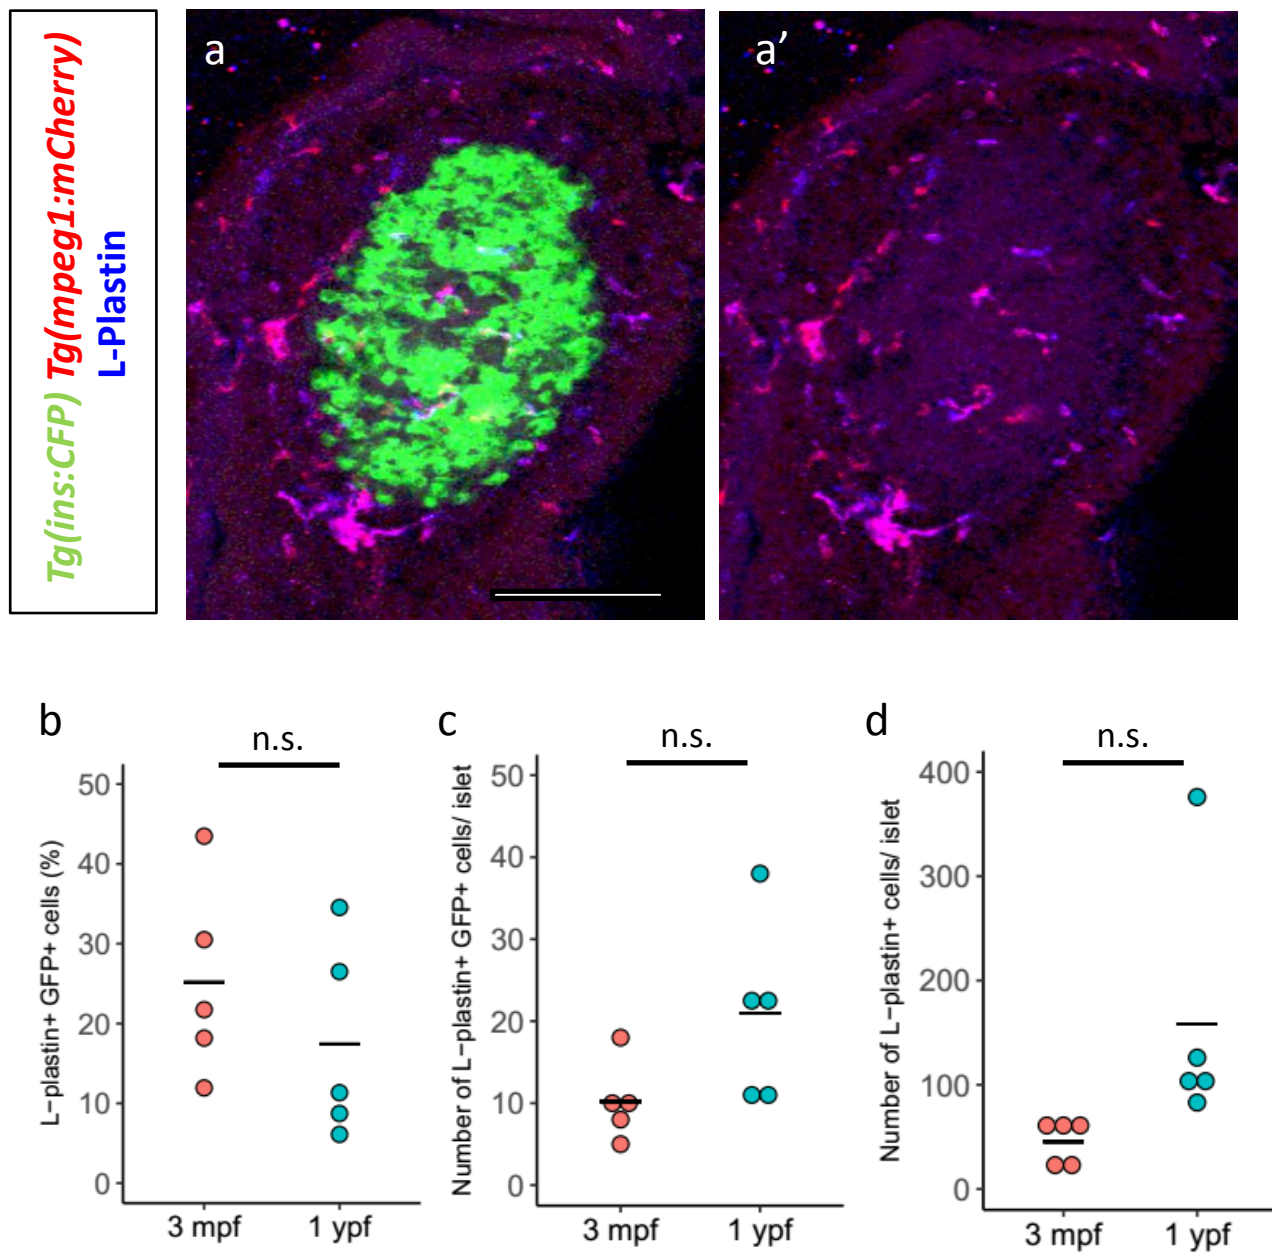

Supplement: supp [file elife-32965-supp-v1.zip]

Figure 6 – figure supplement 1

*Tg(ins:Renilla-mKO2);Tg(NF-kB:GFP)* 3 mpf

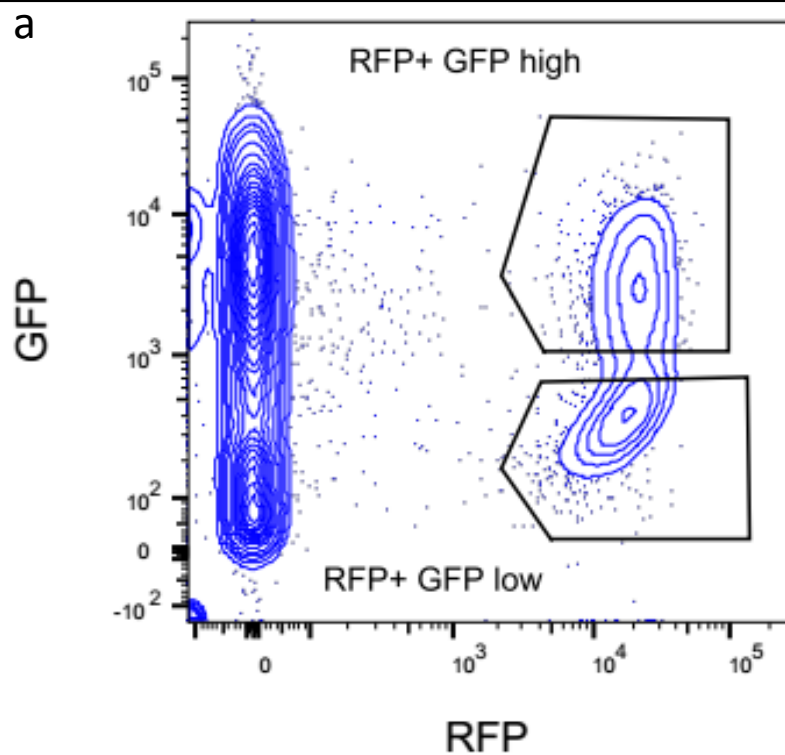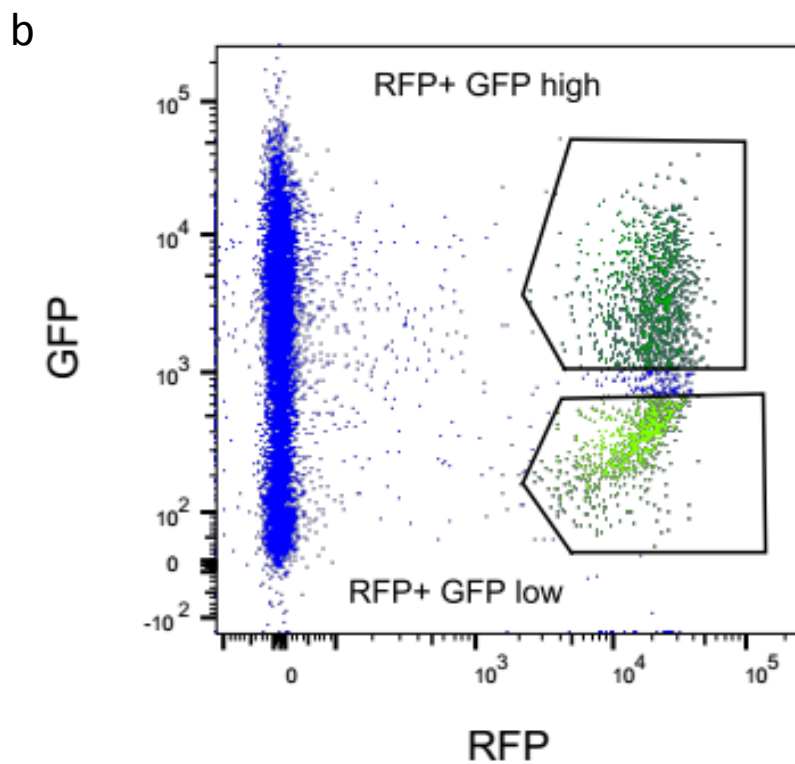

Supplement: supp [file elife-32965-supp-v1.zip]

Figure 2 – figure supplement 1

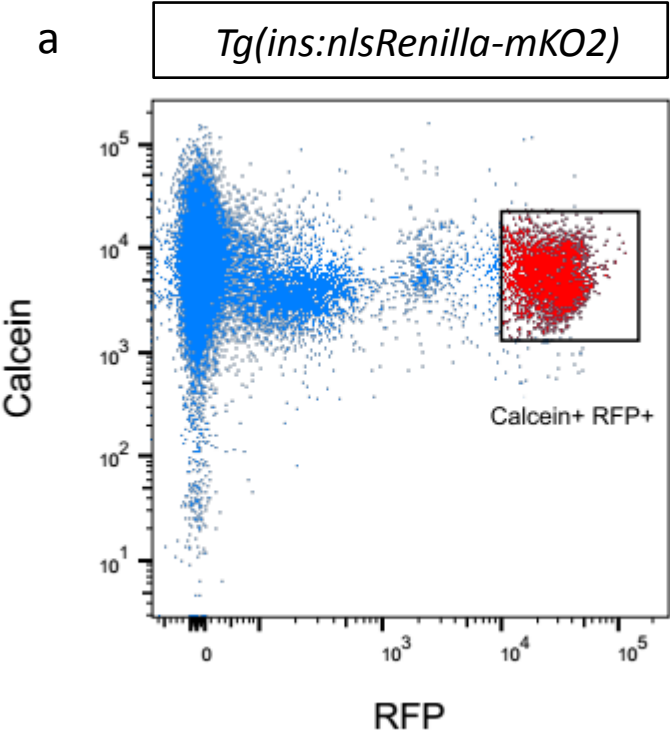

Supplement: supp [file elife-32965-supp-v1.zip]

Figure 1 – figure supplement 1

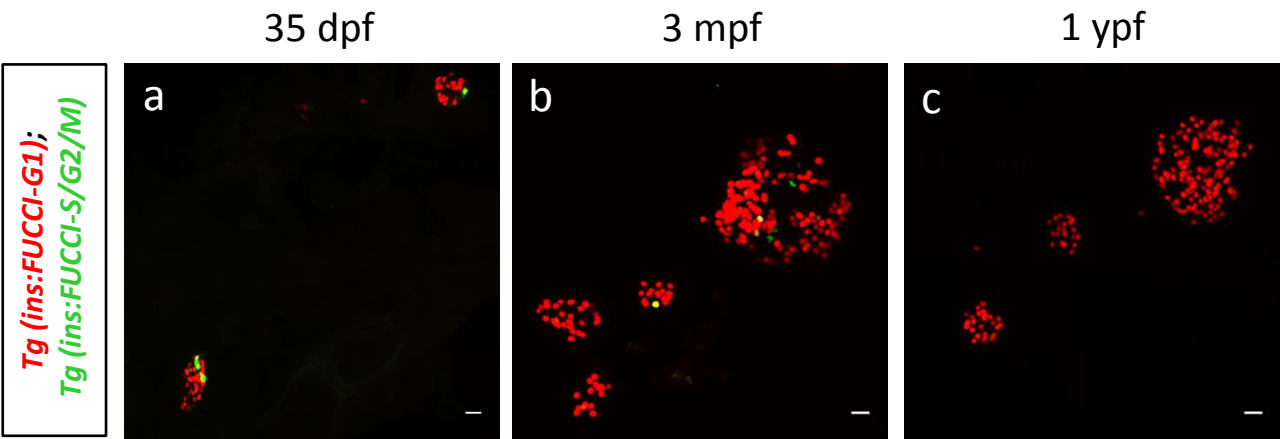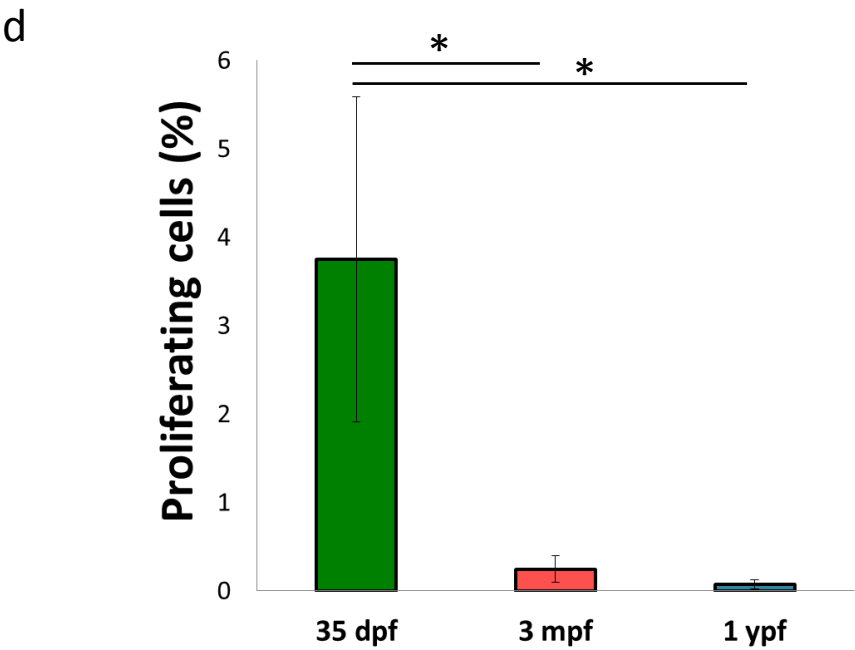

Supplement: supp [file elife-32965-supp-v1.zip]

Figure 3 – figure supplement 2

**beta-cell** / TSQ (30  $\mu$ M)

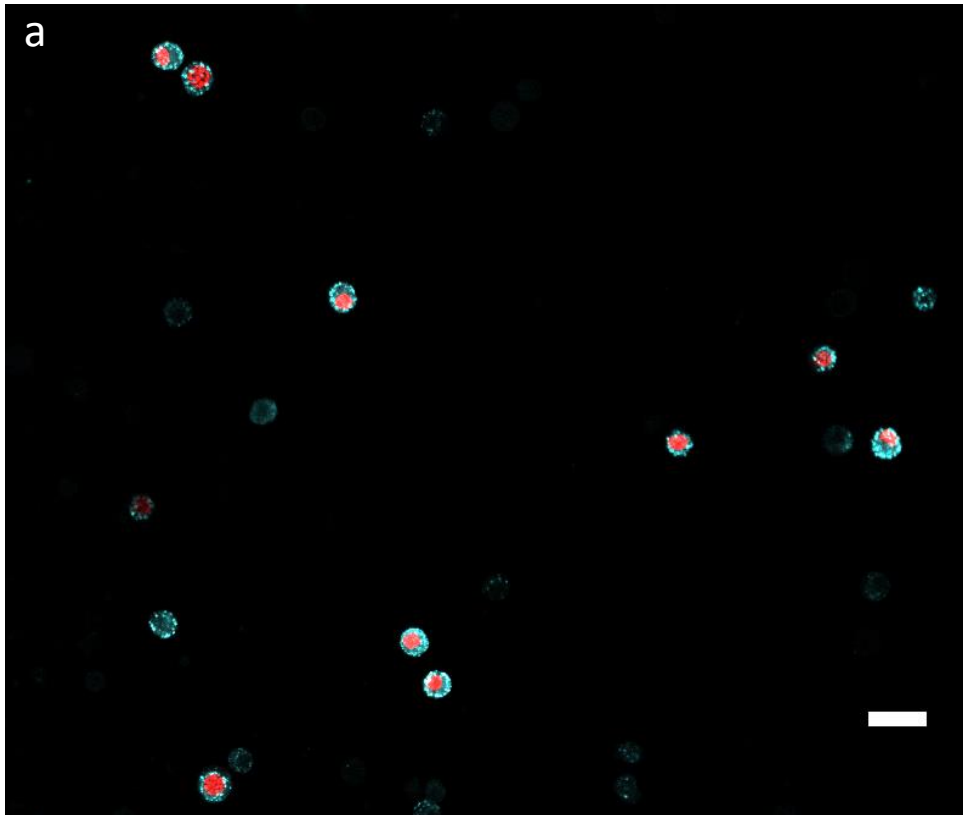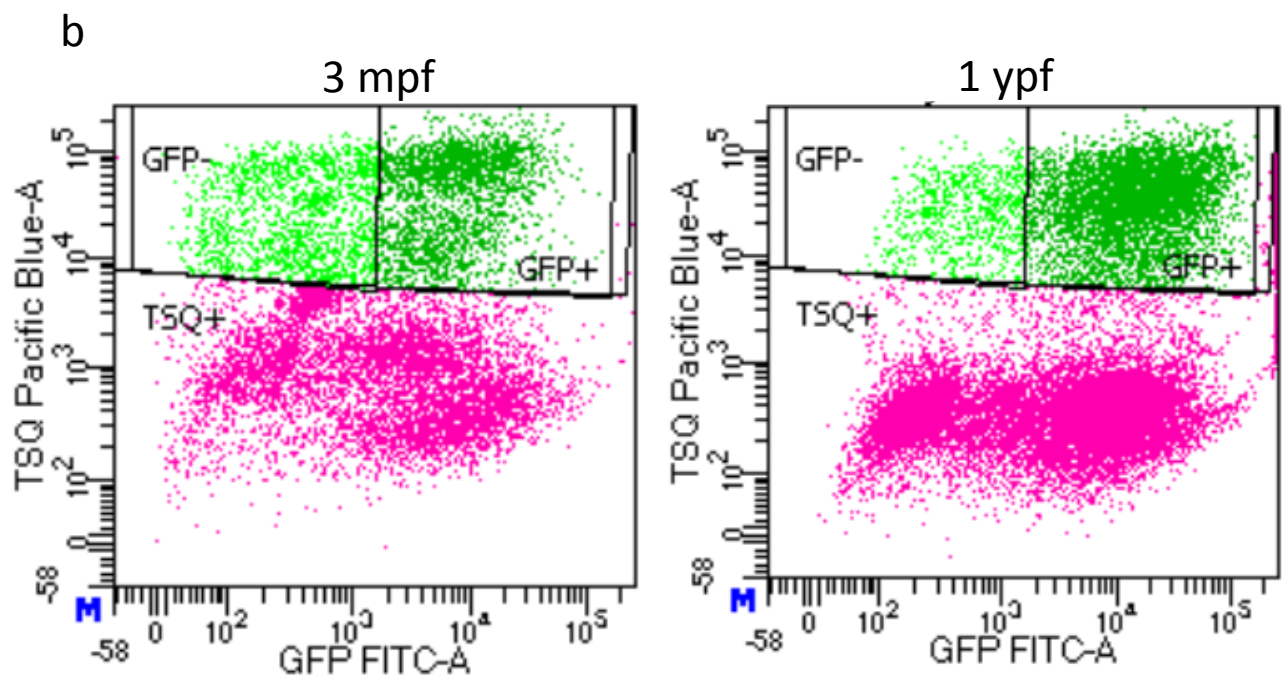

Supplement: supp [file elife-32965-supp-v1.zip]

Figure 5 – figure supplement 1

*Tg(ins:mCherry) Tg(NF-kB:GFP)*

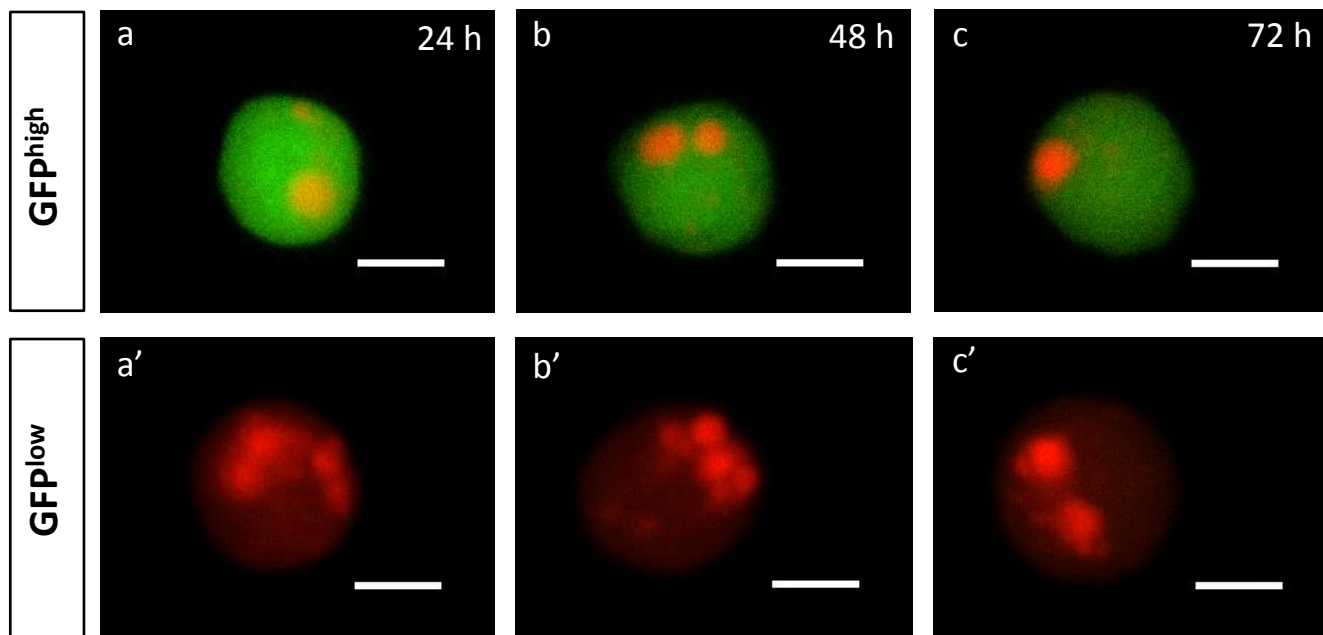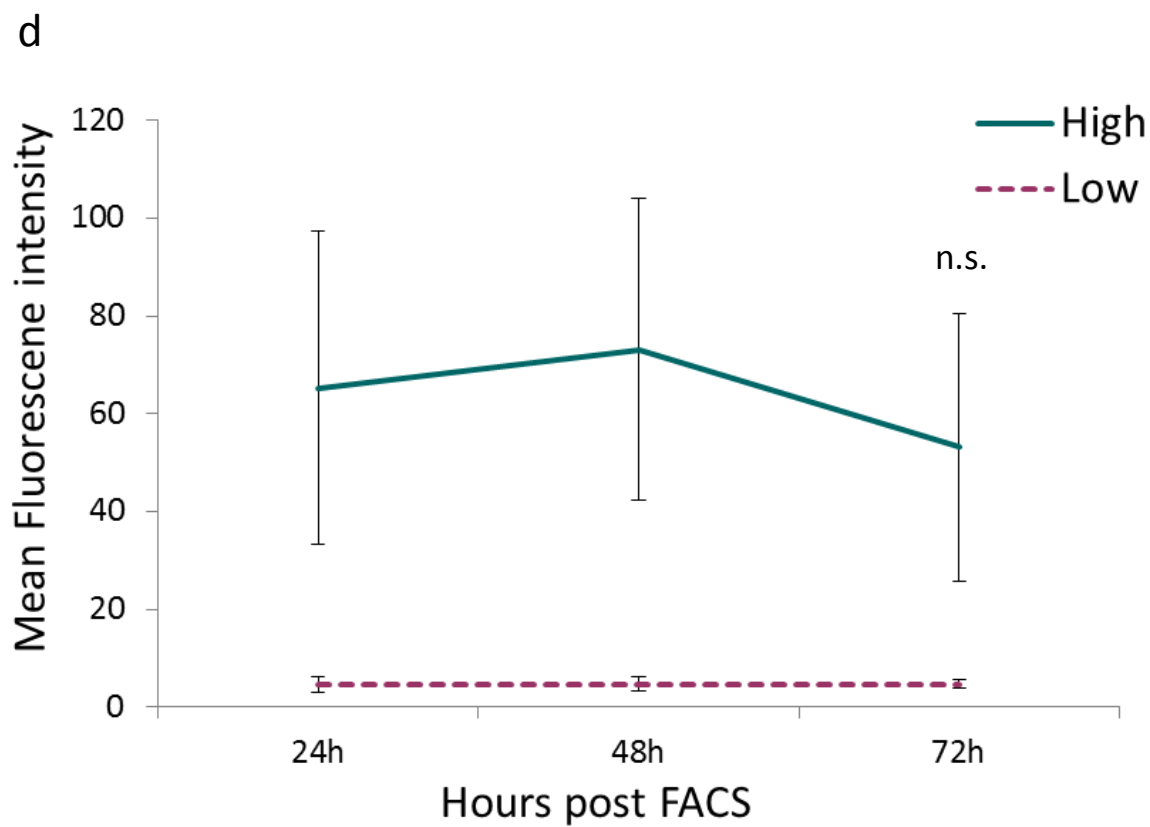

Supplement: supp [file elife-32965-supp-v1.zip]

Figure 3 – figure supplement 1

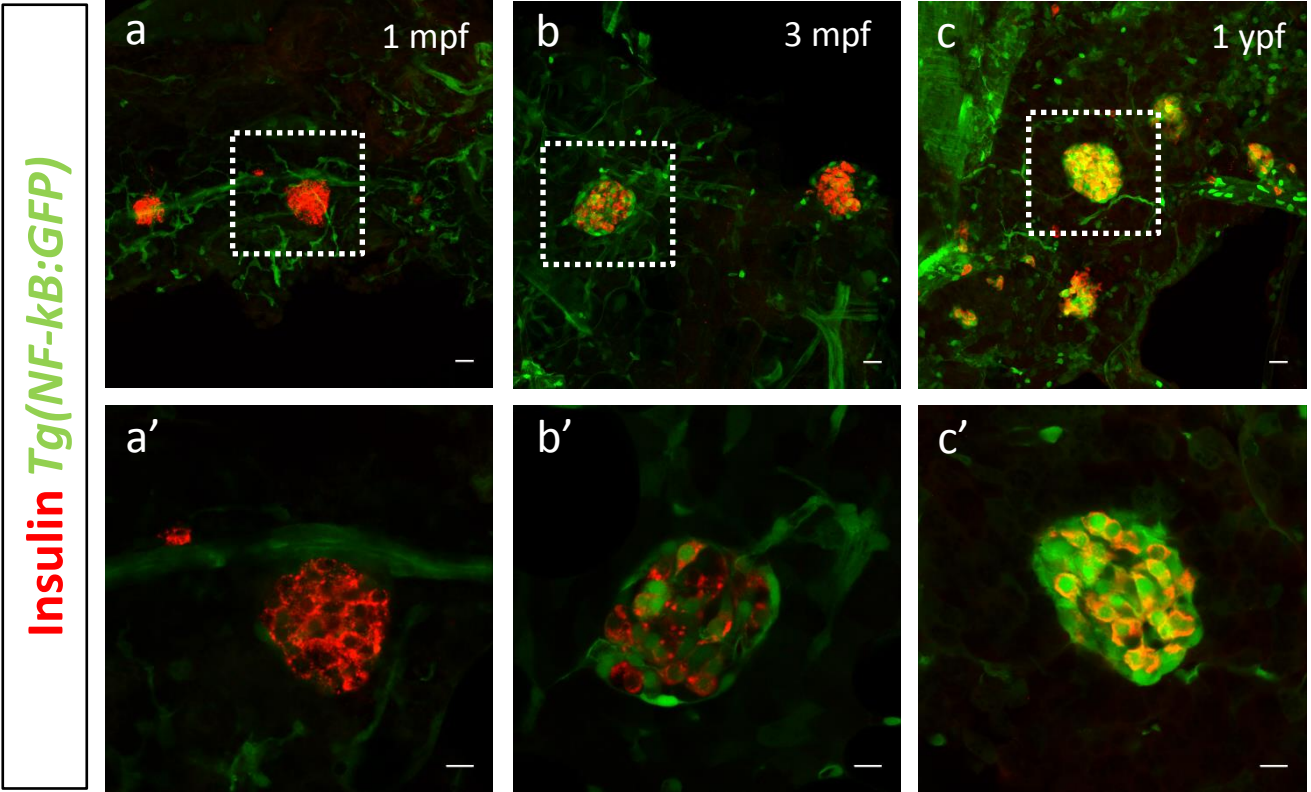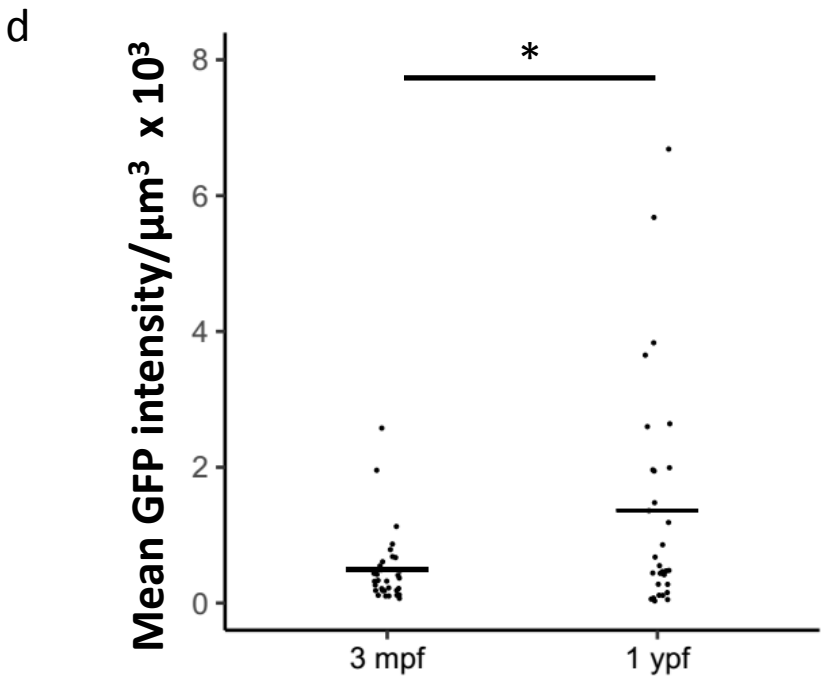

Supplement: supp [file elife-32965-supp-v1.zip]

Figure 5 – figure supplement 2

Insulin *Tg(NF- $\kappa$ B:GFP)* PCNA

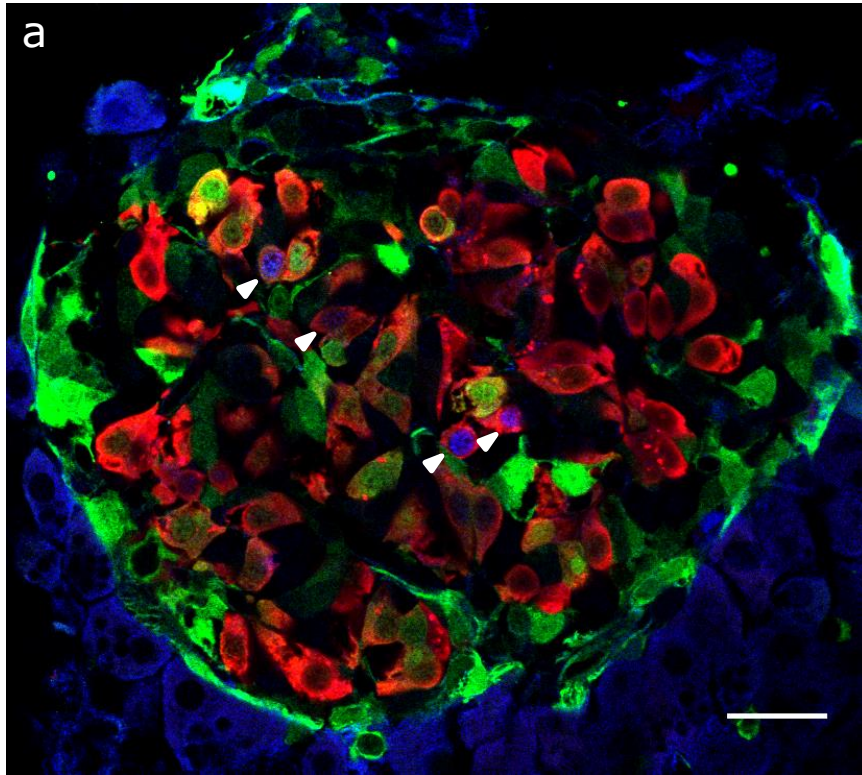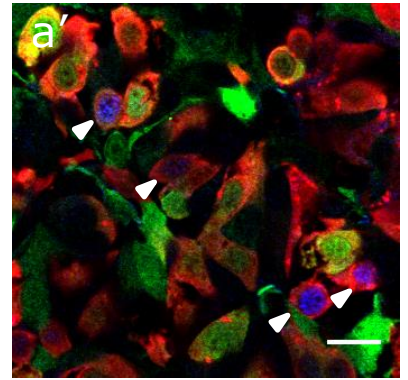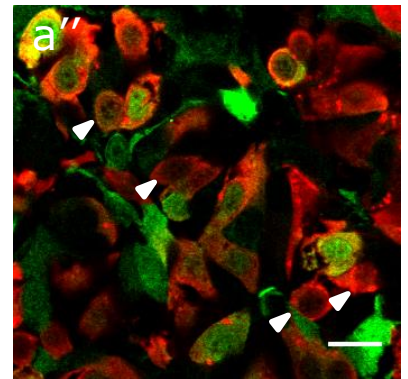

Supplement: supp [file elife-32965-supp-v1.zip]
